# Supplementary material for: Bio-based difuranic polyol monomers and their derived linear and cross-linked polyurethanes
Source: Royal Society of Chemistry journal article supplement (doi:10.1039/c5py02032h), 2016-01-01
Supplement: c5py02032h1.pdf [file c5py02032h1.pdf]

*Electronic Supplementary Information for*

Bio-based difuranic polyol monomers and their derived linear and cross-linked polyurethanes

Zehuai Mou, Shuo (Kelvin) Feng and Eugene Y. X. Chen\*

*Department of Chemistry, Colorado State University, Fort Collins, CO 80523-1872, USA*

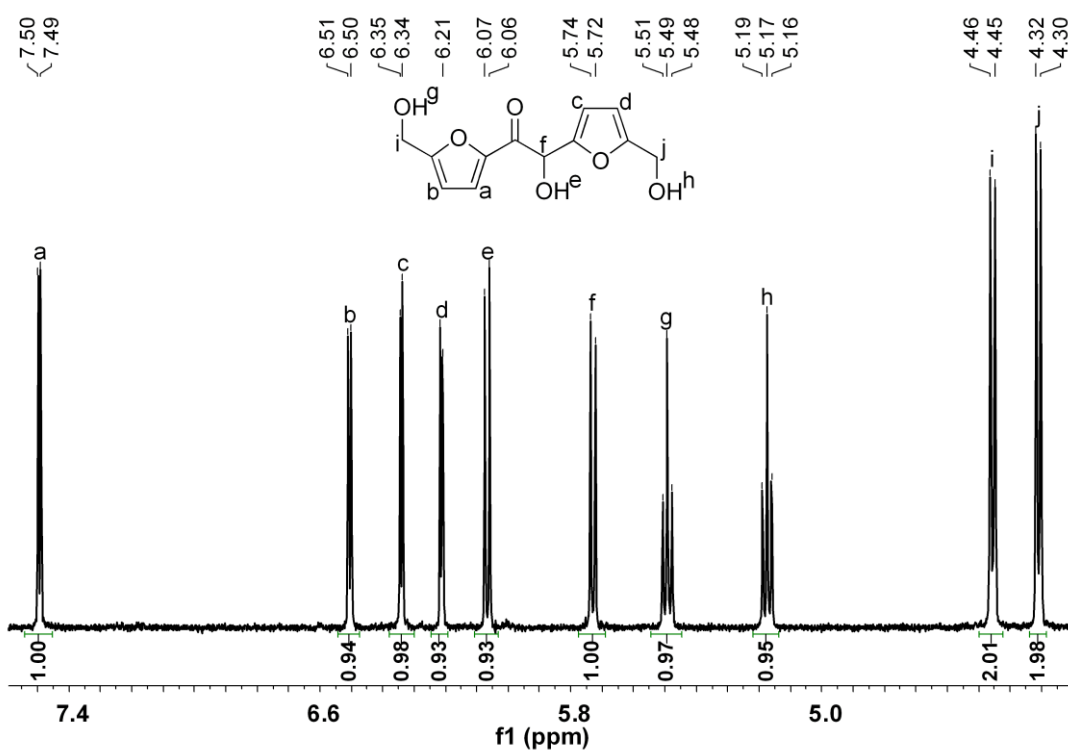

**Fig. S1.** <sup>1</sup>H NMR (DMSO-*d*<sub>6</sub>) spectrum of DHMF.

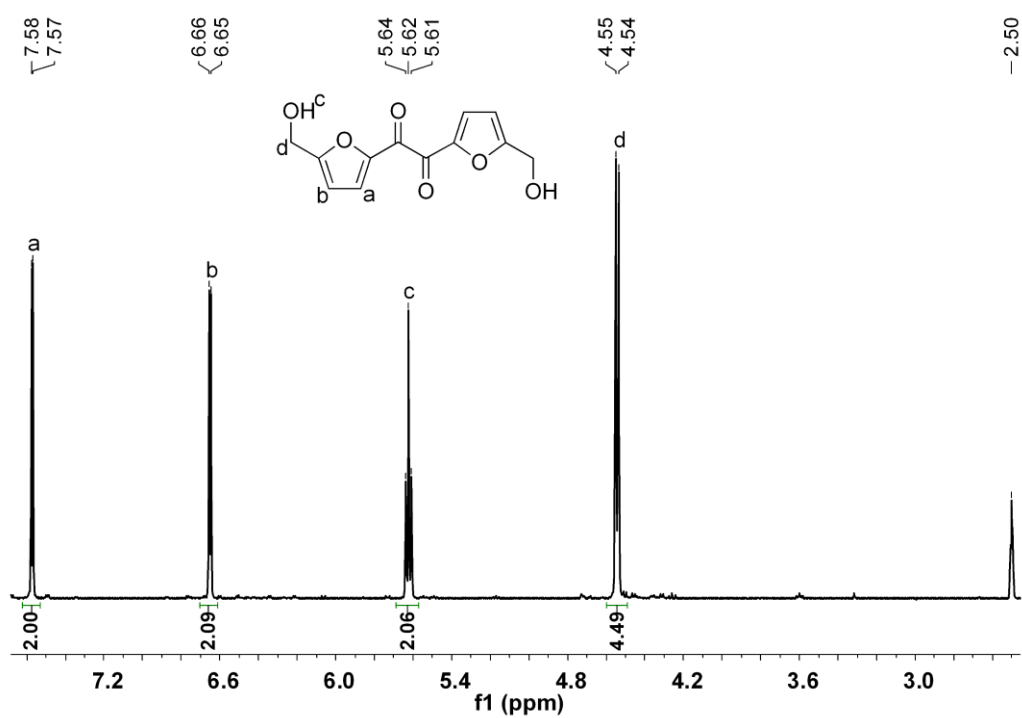

**Fig. S2.**  $^1\text{H}$  NMR ( $\text{DMSO-}d_6$ ) spectrum of BHMF.

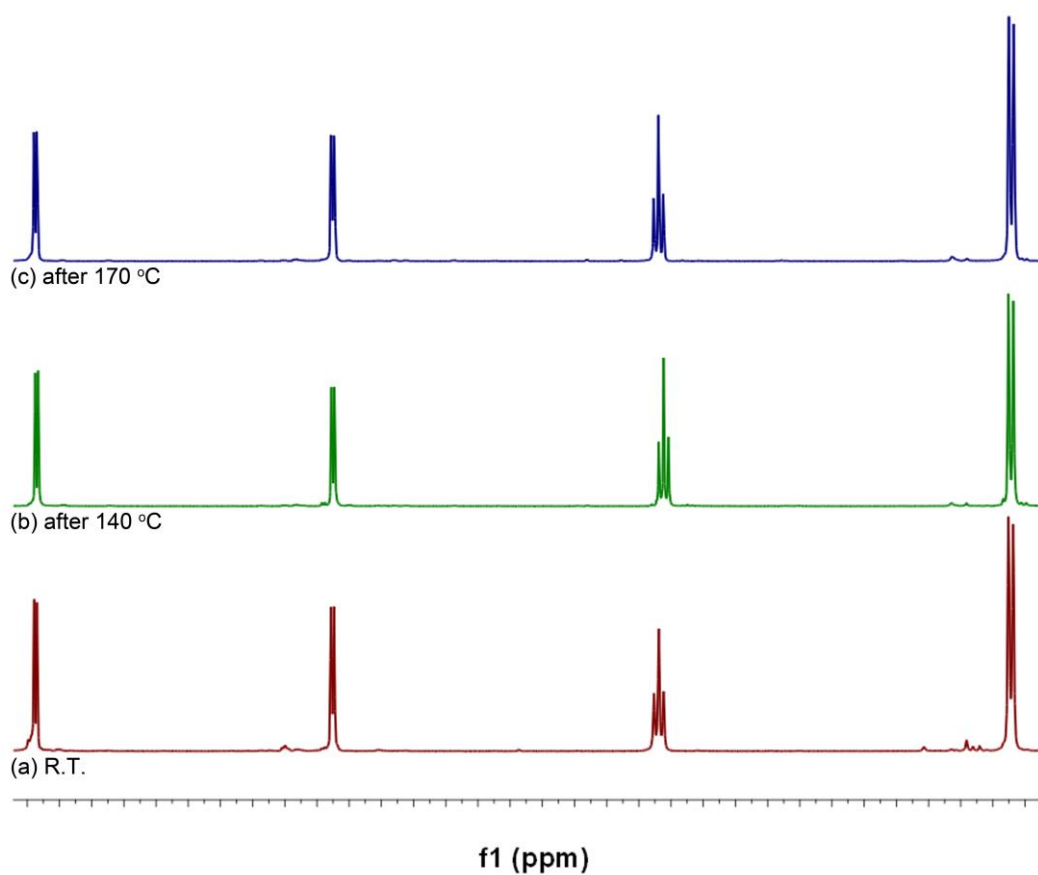

**Fig. S3.**  $^1\text{H}$  NMR ( $\text{DMSO-}d_6$ ) spectra of BHMF after heat treatment.

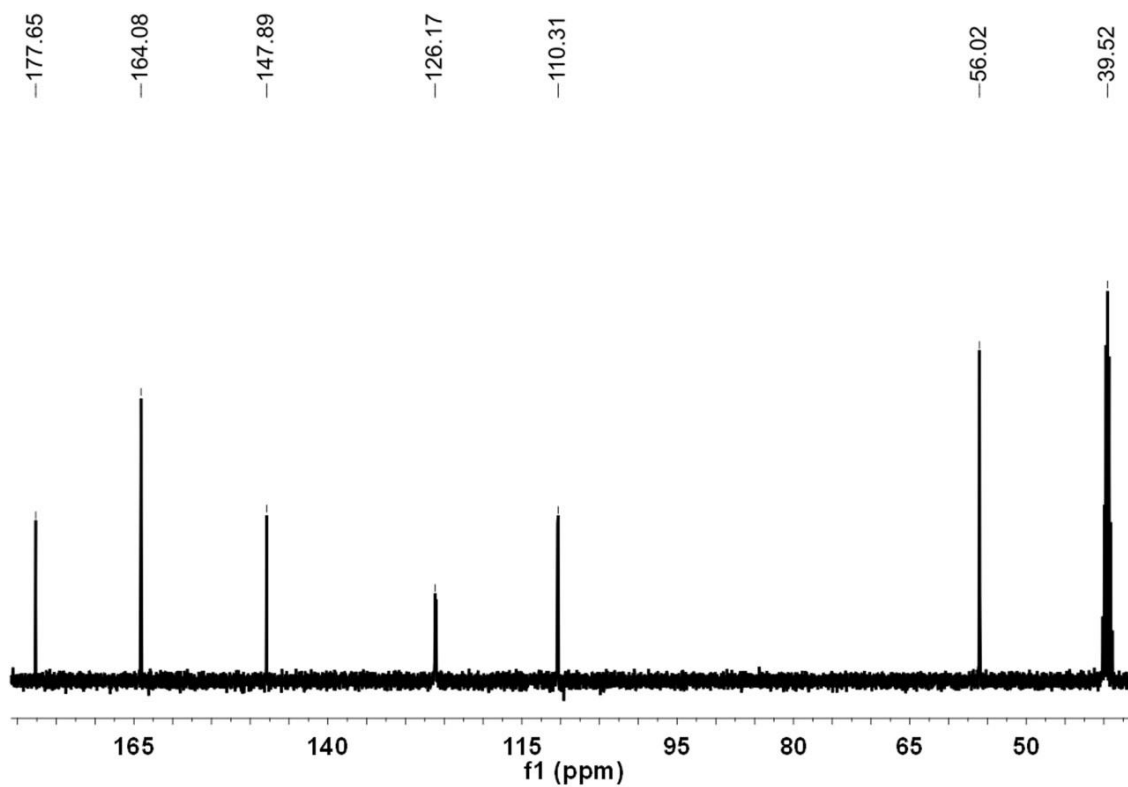

Fig. S4.  $^{13}\text{C}$  NMR (DMSO- $d_6$ ) spectrum of BHMf.

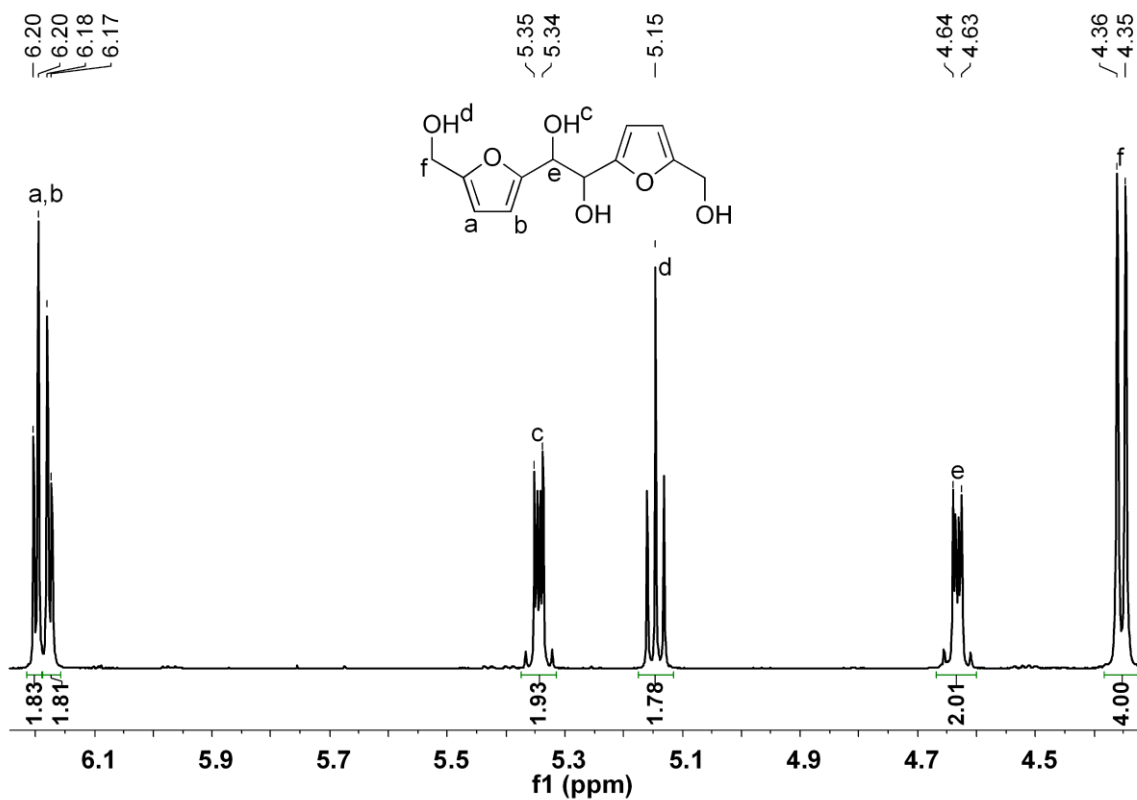

Fig. S5.  $^1\text{H}$  NMR (DMSO- $d_6$ ) spectrum of BHMf.

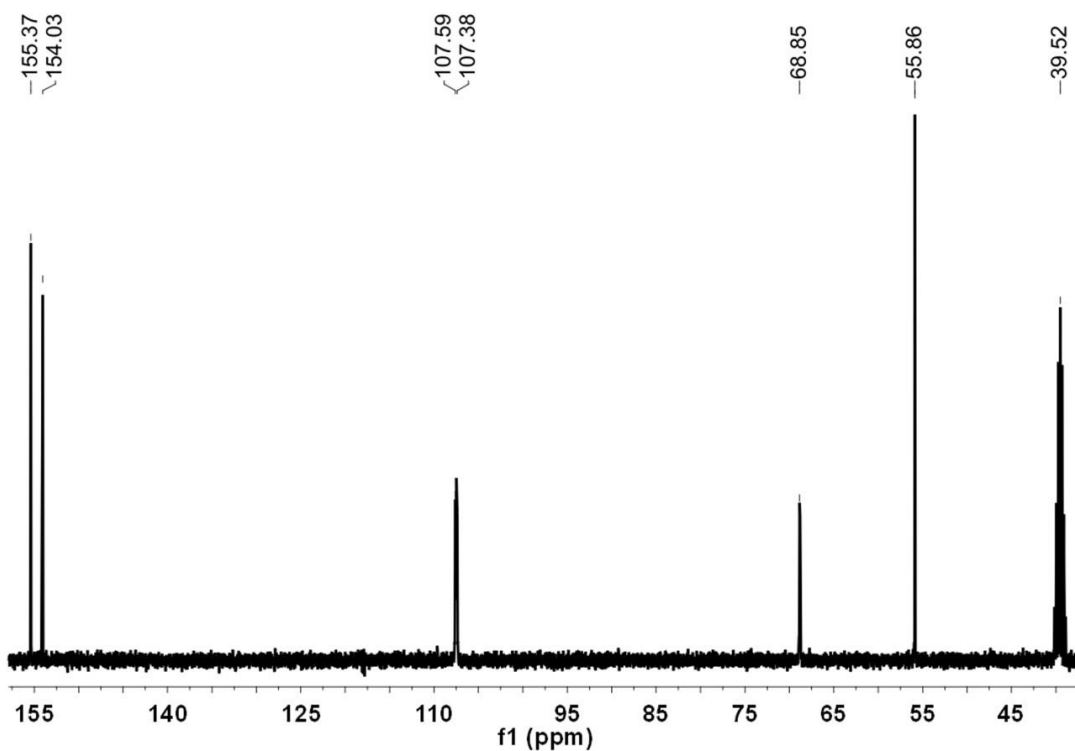

**Fig. S6.**  $^{13}\text{C}$  NMR ( $\text{DMSO-}d_6$ ) spectrum of BHMH.

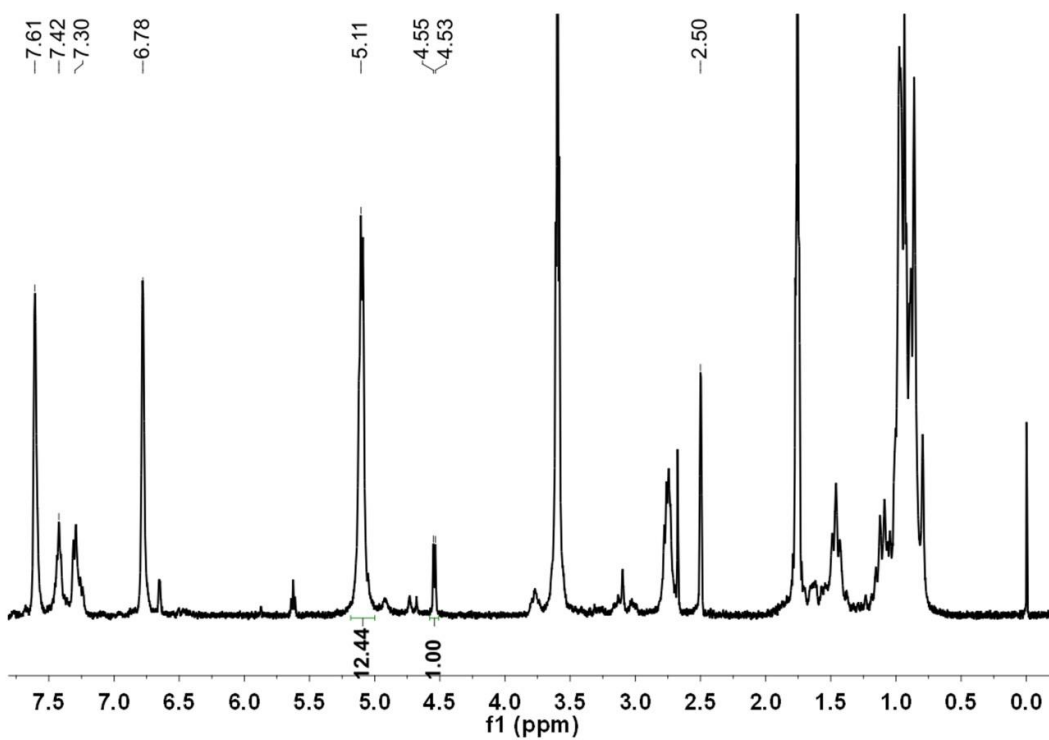

**Fig. S7.**  $^1\text{H}$  NMR ( $\text{DMSO-}d_6$ ) spectrum of polymerization reaction mixture (BHMf and IPDI) catalyzed by DABCO ( $30\text{ }^\circ\text{C}$ , 24 h).

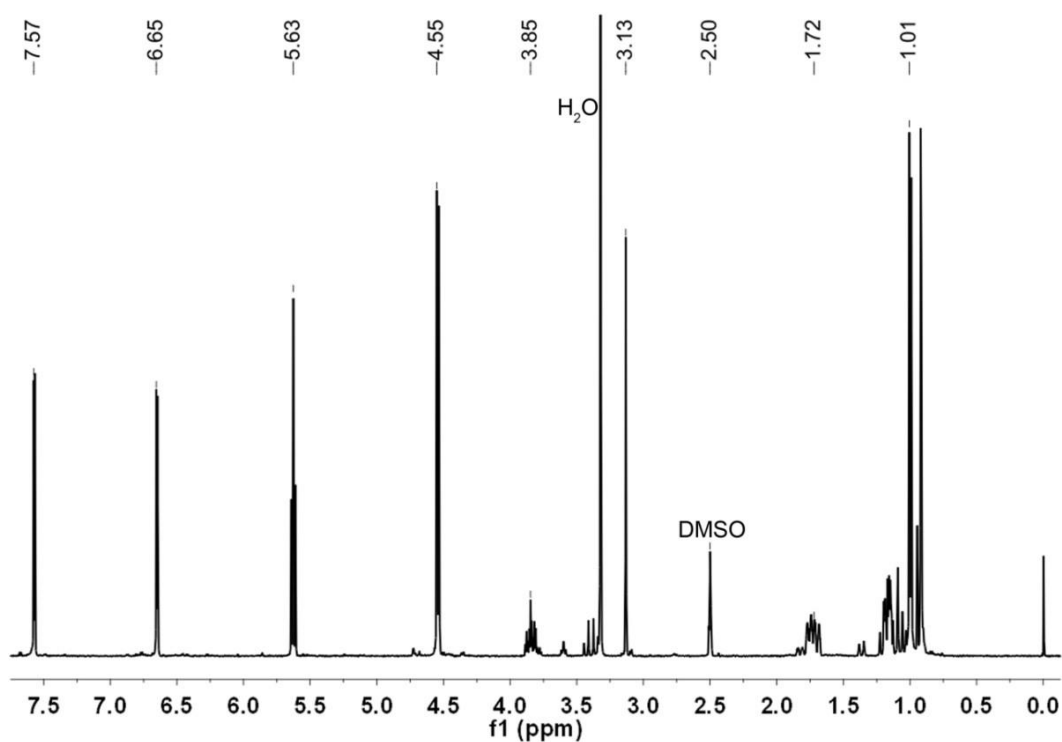

**Fig. S8.**  $^1\text{H}$  NMR ( $\text{DMSO-}d_6$ ) spectrum of mixture (BHMf and IPDI) without any catalyst ( $30\text{ }^\circ\text{C}$ , 24 h).

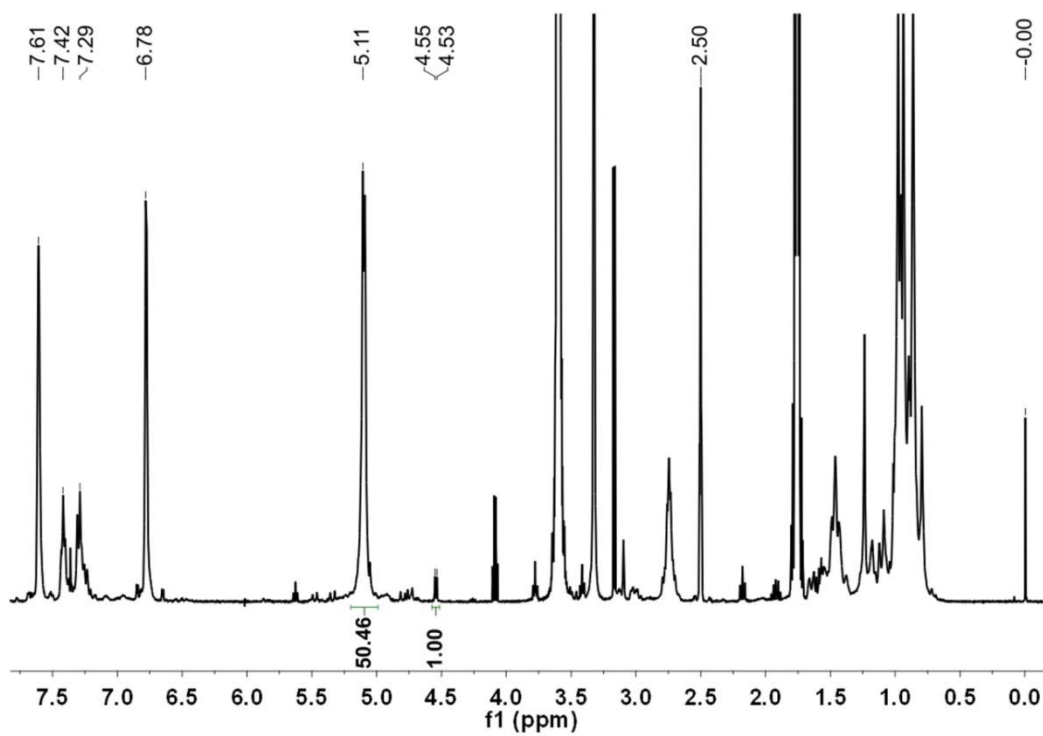

**Fig. S9.**  $^1\text{H}$  NMR ( $\text{DMSO-}d_6$ ) spectrum of polymerization reaction mixture (BHMf and IPDI) catalyzed by DBTDL ( $30\text{ }^\circ\text{C}$ , 24 h).

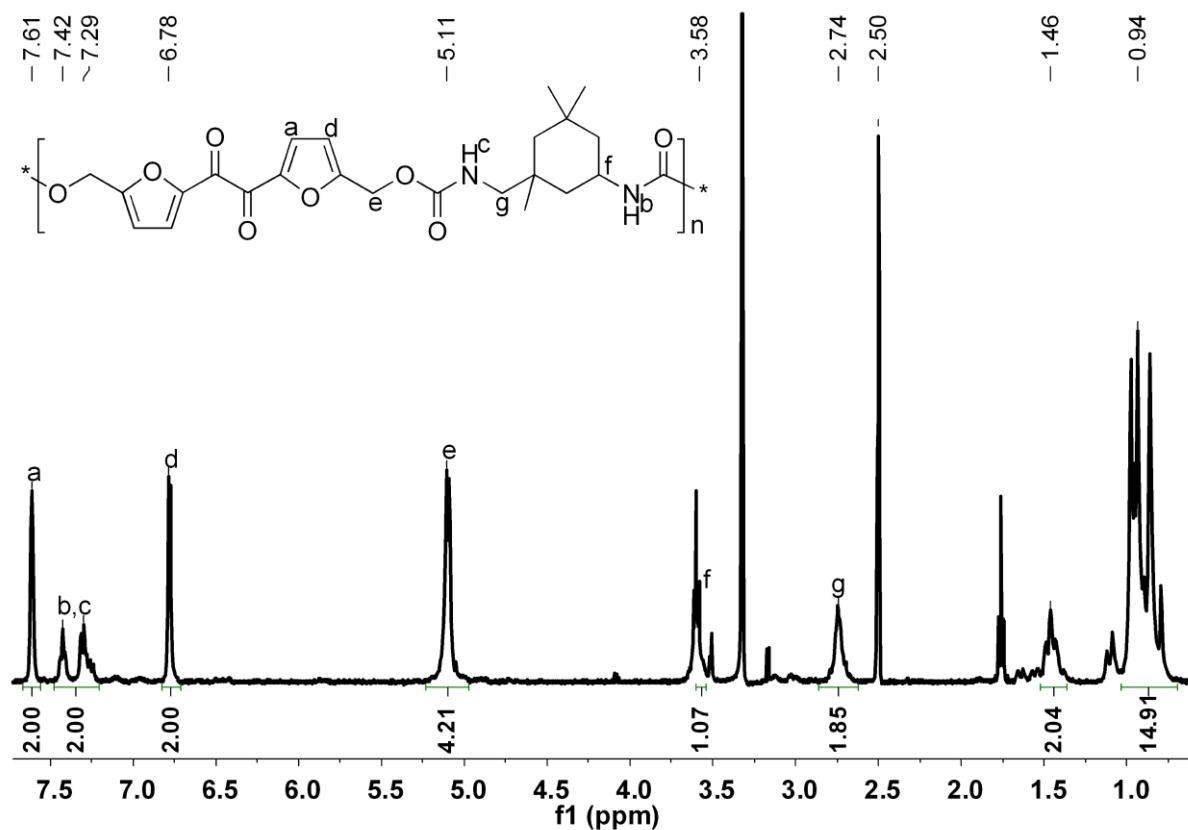

Fig. S10. <sup>1</sup>H NMR (DMSO-*d*<sub>6</sub>) spectrum of PU-1.

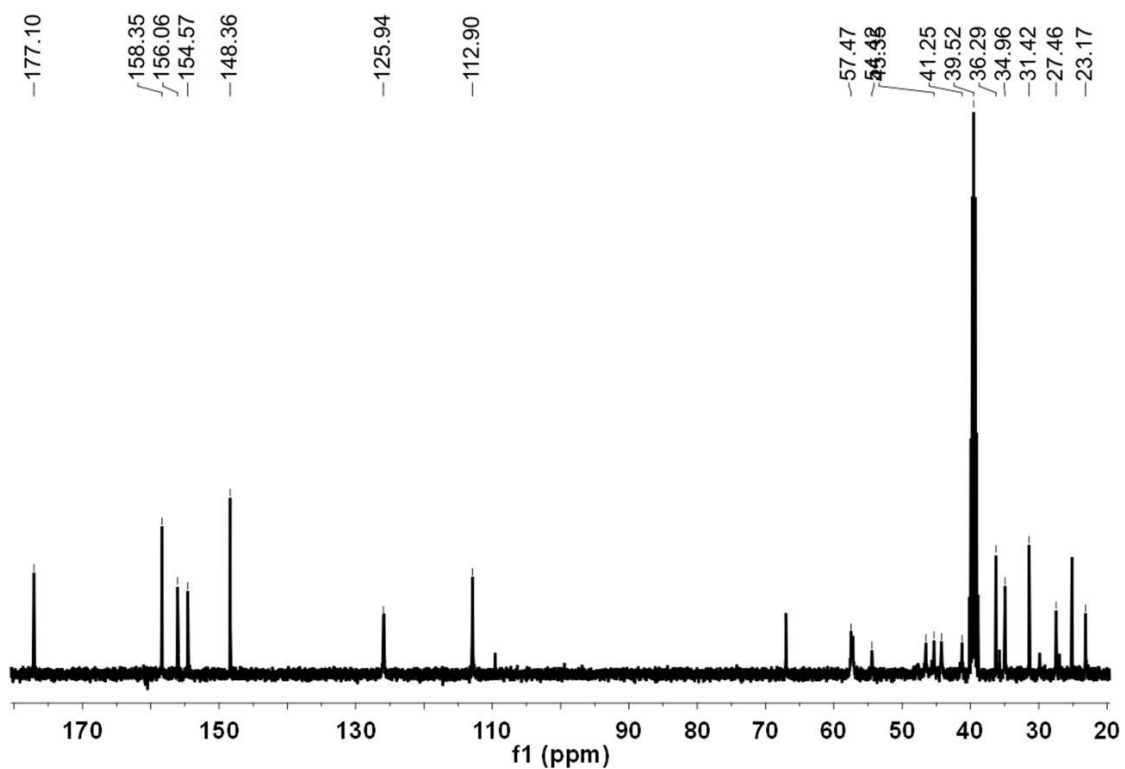

Fig. S11. <sup>13</sup>C NMR (DMSO-*d*<sub>6</sub>) spectrum of PU-1.

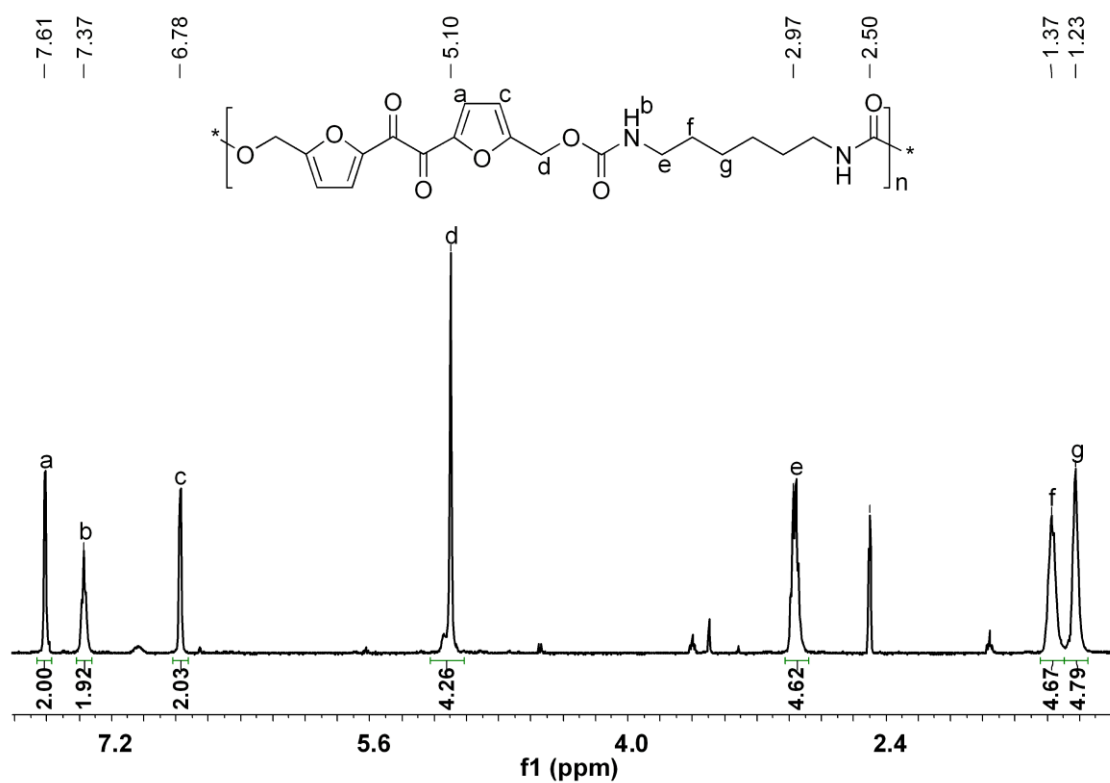

Fig. S12.  $^1\text{H}$  NMR (DMSO- $d_6$ ) spectrum of PU-2.

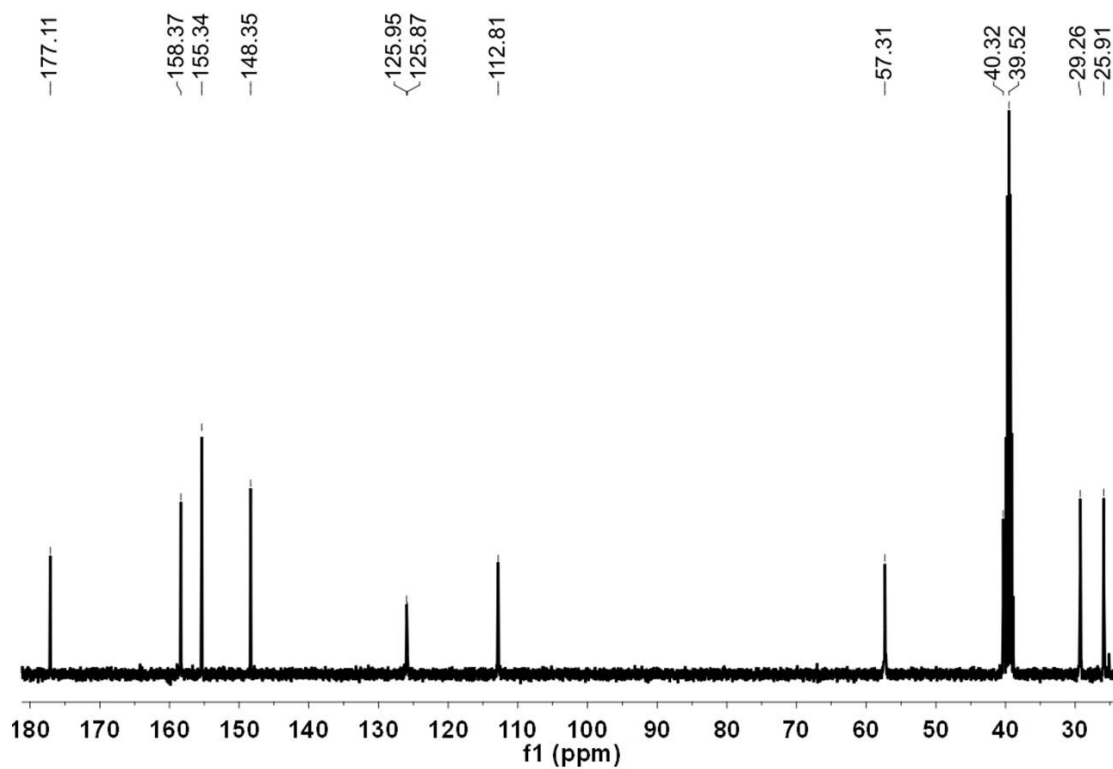

Fig. S13.  $^{13}\text{C}$  NMR (DMSO- $d_6$ ) spectrum of PU-2.

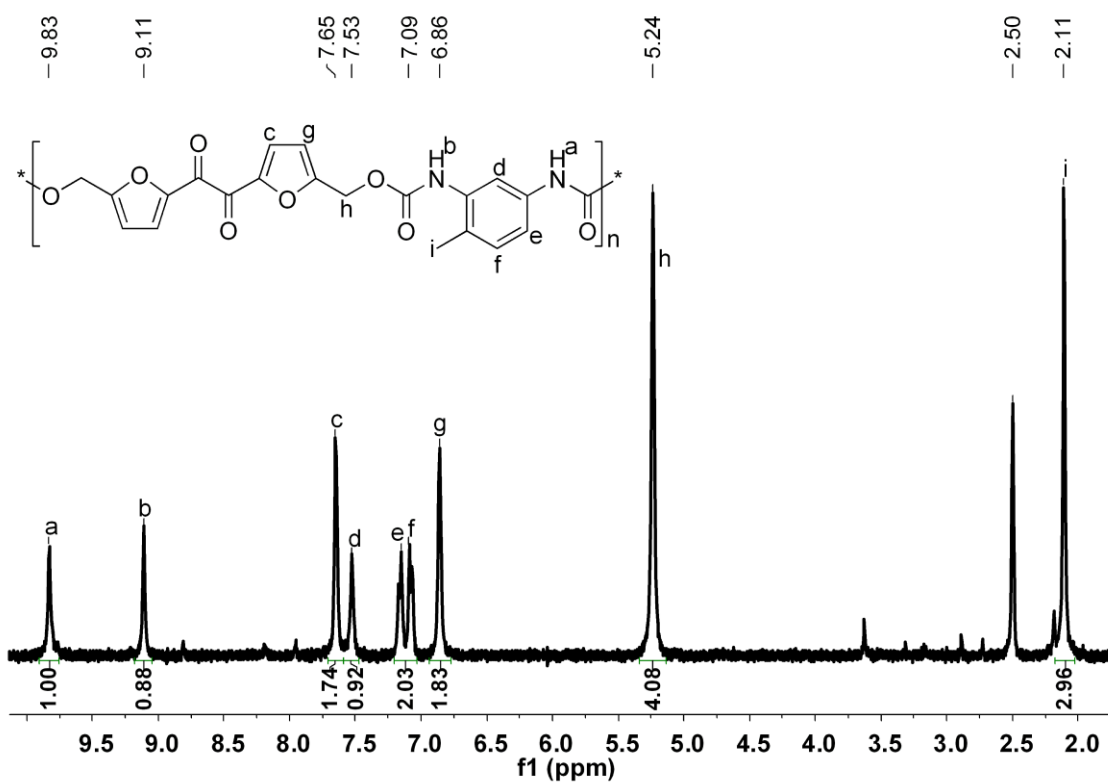

Fig. S14. <sup>1</sup>H NMR (DMSO-*d*<sub>6</sub>) spectrum of PU-3.

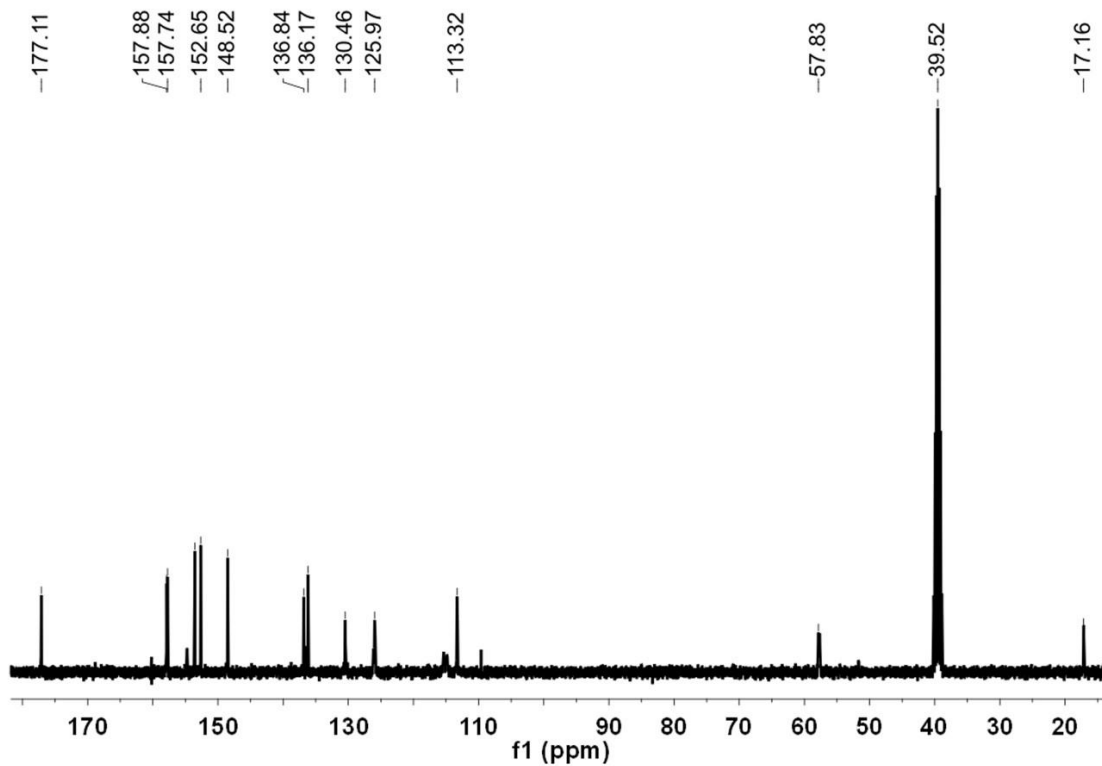

Fig. S15. <sup>13</sup>C NMR (DMSO-*d*<sub>6</sub>) spectrum of PU-3.



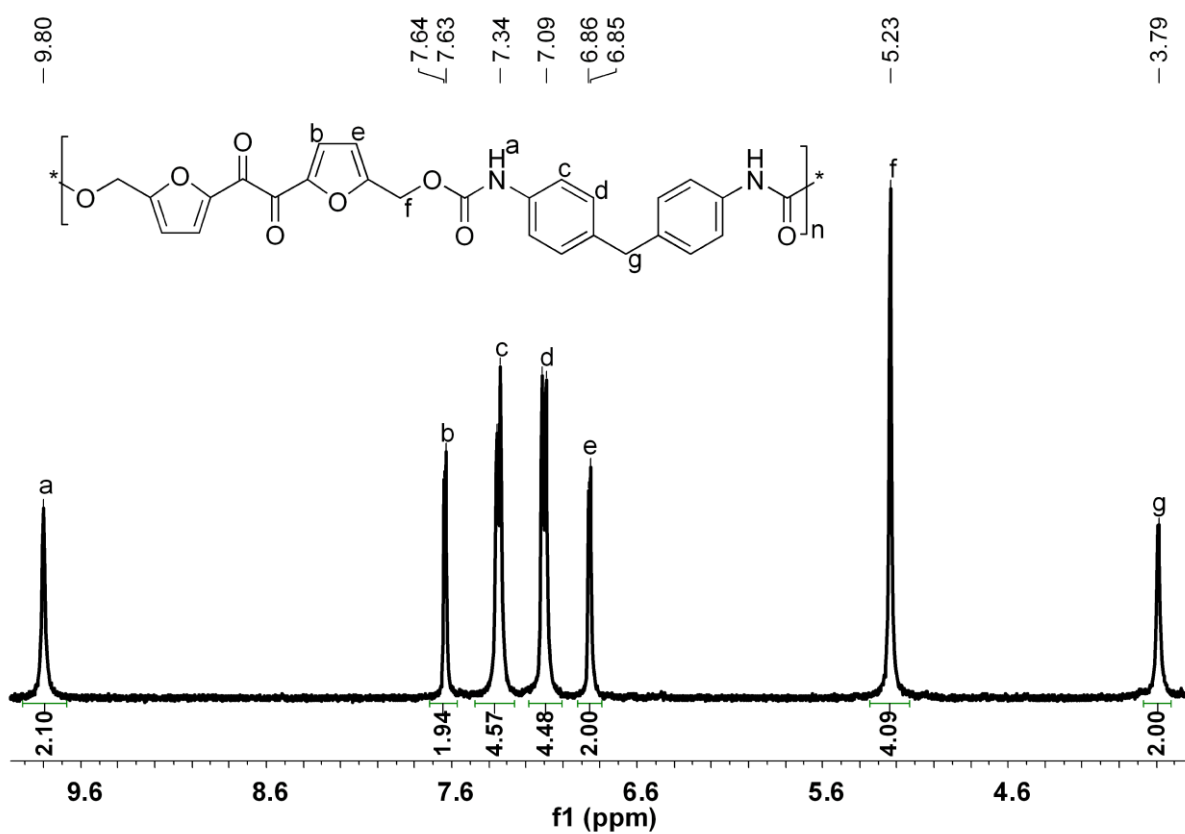

Fig. S16. <sup>1</sup>H NMR (DMSO-*d*<sub>6</sub>) spectrum of PU-4.

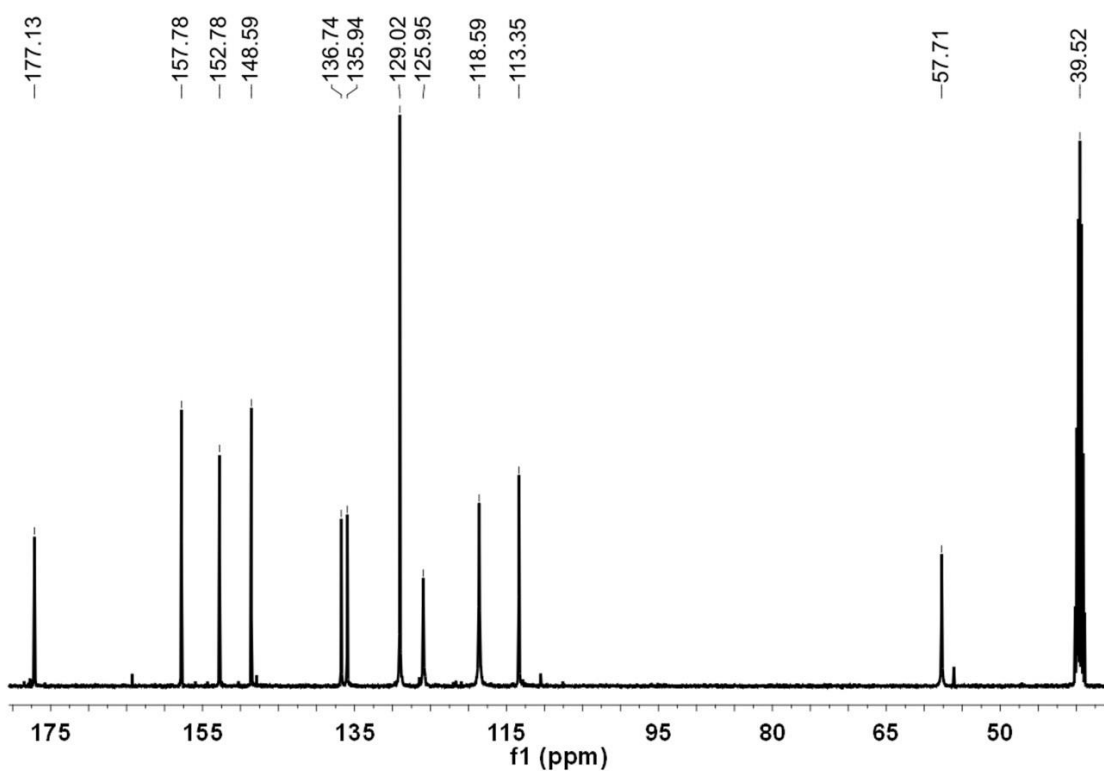

Fig. S17. <sup>13</sup>C NMR (DMSO-*d*<sub>6</sub>) spectrum of PU-4.

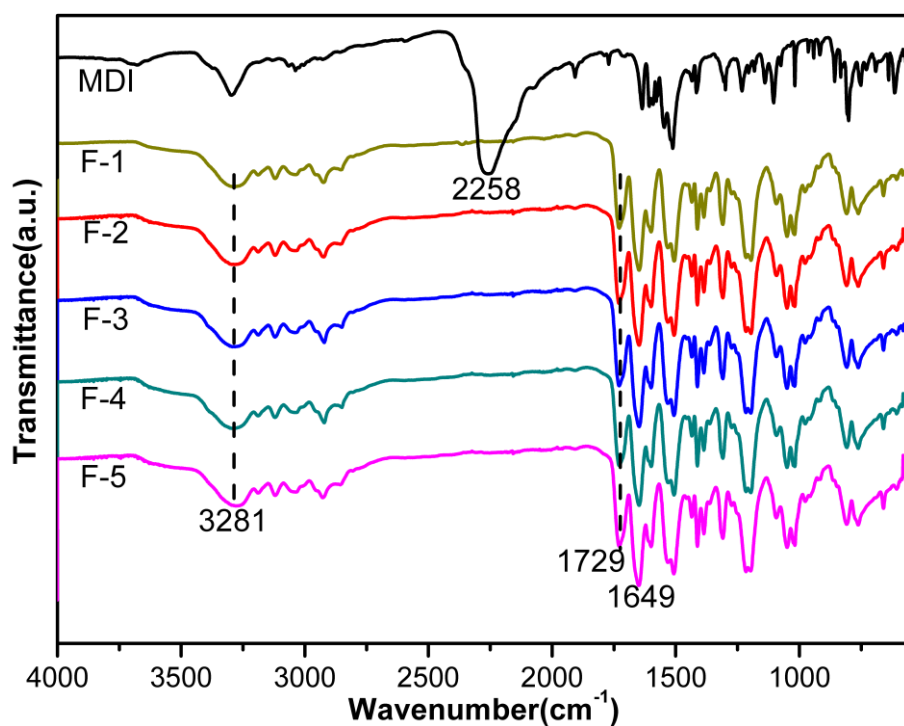

**Fig. S18.** FT-IR spectrum of PU films derived from BHMf (with or without DHMF or BHMh) and MDI.

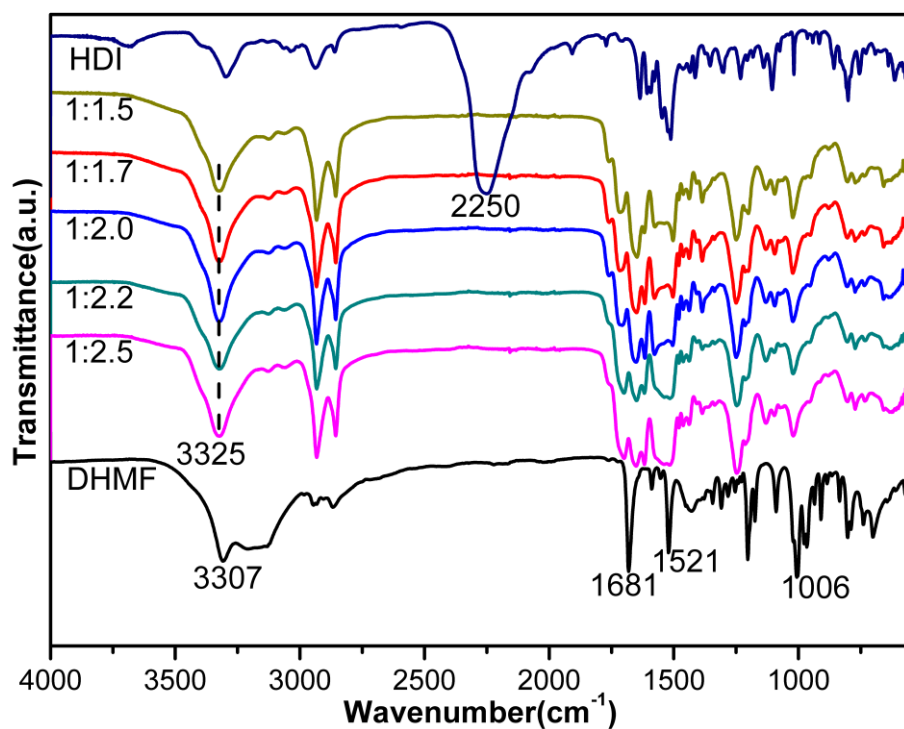

**Fig. S19.** FT-IR spectrum of PU films derived from DHMF and HDI.

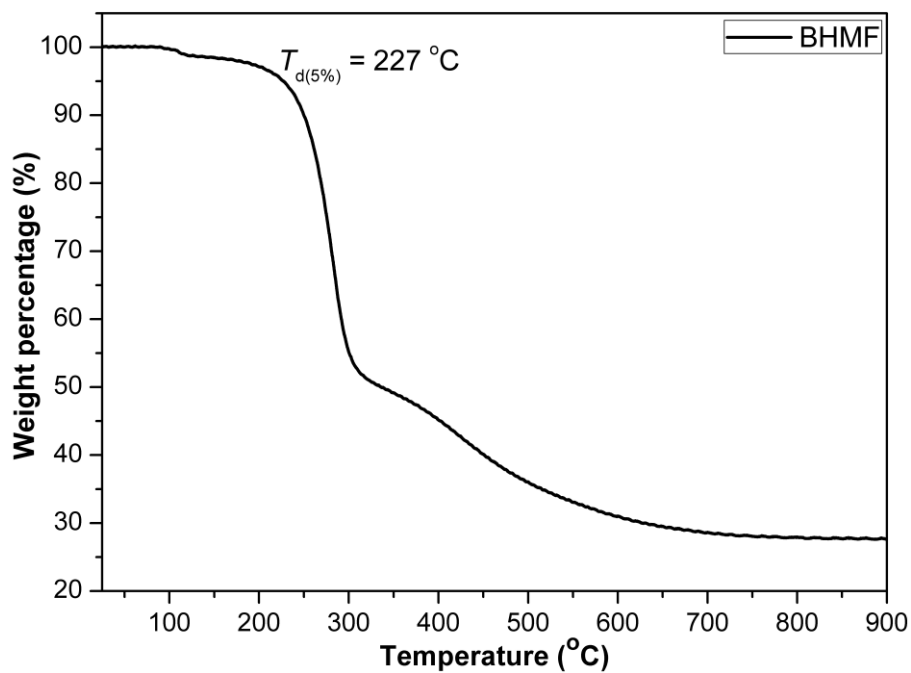

**Fig. S20.** TGA curve of BHMf.

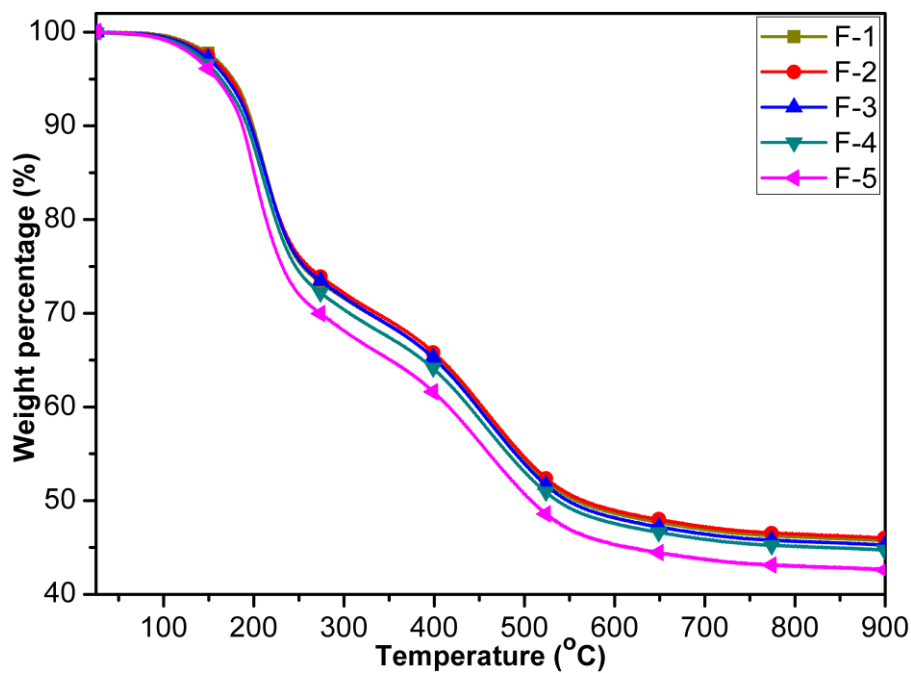

**Fig. S21.** TGA traces of PU films derived from BHMf (with or without DHMF or BHMH) and MDI.

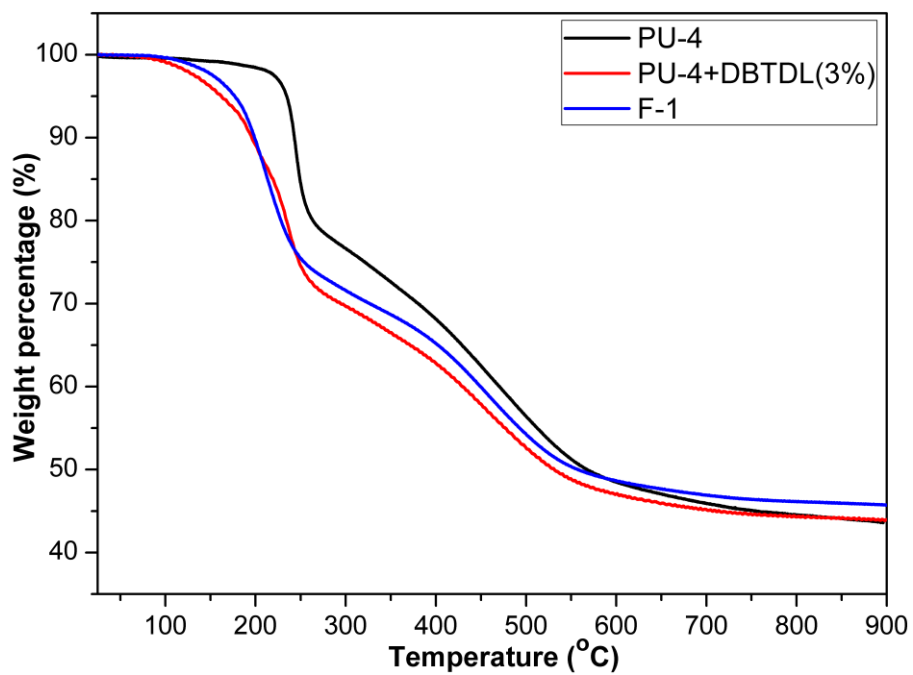

**Fig. S22.** TGA curves of different materials derived from BHMf and MDI under different conditions.
